# Supplementary material for: Preparation of fluorescent organic nanoparticlesviaself-polymerization for tartrazine detection in food samples
Source: Royal Society of Chemistry journal article supplement (doi:10.1039/d1nj05176h), 2022-01-01
Supplement: d1nj05176h1.pdf [file d1nj05176h1.pdf]

## Supporting Information

### Preparation of fluorescent organic nanoparticles via self-polymerization for tartrazine detection in food samples

Liping Lin,<sup>\*a</sup> Qiaoling Zheng,<sup>a</sup> Qiushuang Chen,<sup>a</sup> Meng Fang,<sup>a</sup> Qingjiao Lai,<sup>a</sup> Xinghao He,<sup>a</sup> Jinying Qin,<sup>a</sup> Zu-jin Lin,<sup>a</sup> Rongguang Lin<sup>a</sup>

<sup>a</sup>Department of Applied Chemistry, College of Life Sciences, Fujian Agriculture and Forestry University, Fuzhou 350002, China.

**Table 1** The fitted lifetimes and respective parameters of PDA NPs with and without 30  $\mu$ M tartrazine (here,  $\tau_{average} = (B_1\tau_1^2 + B_2\tau_2^2 + B_3\tau_3^2)/(B_1\tau_1 + B_2\tau_2 + B_3\tau_3)$ )

| Samples                    | $\tau_1$ (ns) | $B_1$    | $\tau_2$ (ns) | $B_2$    | $\tau_3$ (ns) | $B_3$    | $\tau_{average}$ (ns) |
|----------------------------|---------------|----------|---------------|----------|---------------|----------|-----------------------|
| PDA NPs                    | 0.6389        | 1398.57  | 3.2336        | 1148.944 | 7.6445        | 558.1998 | 5.1                   |
| PDA NPs<br>+<br>tartrazine | 0.5697        | 1788.658 | 3.1797        | 990.9041 | 8.2188        | 383.7544 | 5.0                   |

**Table 2** Comparison of different fluorescent probes towards tartrazine from the aspects of sensing range, detection limit and responsive time

| Methods                                                         | sensing range/( $\mu\text{M}$ ) | detection limit/(nM) | responsive time/(min) | References |
|-----------------------------------------------------------------|---------------------------------|----------------------|-----------------------|------------|
| fluorescent polydopamine nanoparticles (PDA NPs)                | 1.5-45                          | 550                  | 2                     | This work  |
| fluorescent nickel nanoclusters                                 | 0.01-3.5                        | 4                    | 3                     | [1]        |
| nitrogen and sulfur co-doped carbon quantum dots                | 11.16-36.56                     | 18                   | 5                     | [2]        |
| 3-mercapto-1,2,4-triazolecapped gold nanoclusters               | 0.08-37.5                       | 28                   | 5                     | [3]        |
| N,Cl co-doped fluorescent carbon dots                           | 0.1-30                          | 48                   | Not mentioned         | [4]        |
| aloe derived carbon quantum dots                                | 0.25-32.50                      | 73                   | 5                     | [5]        |
| hydroxypropyl- $\beta$ -cyclodextrin capped sulfur quantum dots | 0-30                            | 82                   | 2                     | [6]        |

### References

- 1 Y. Wang, Y.X. Mu, J. Hu, Q.F. Zhuang, Y.N. Ni, *Spectrochim. Acta A*, 2019, **214**, 445.
- 2 Y.P. Li, Y. Jia, Q. Zeng, X.H. Jiang, Z.J. Cheng, *Spectrochim. Acta A*, 2019, **211**, 178.
- 3 X.P. Yang, N.Luo, Z.J. Tan, Z.H. Jia, X.J. Liao, *Food Anal. Methods*, 2017, **10**, 1308.
- 4 X.P. Yang, J. Xu, N. Luo, F.L. Tang, M.X. Zhang, B. Zhao, *Food Chem.*, 2020, **310**, 125832.
- 5 H. Xu, X.P. Yang, G. Li, C. Zhao, X.J. Liao, *J. Agric. Food Chem.*, 2015, **63**, 6707.
- 6 Z.M. Huang, J.H. Lei, H. Ruan, Y.Y. Gong, G. Wang, L. Zhou, *Microchem. J.*, 2021, **164**, 106031.
